# Supplementary material for: An anti-cancer WxxxE-containing azurin polypeptide inhibits Rac1-dependent STAT3 and ERK/GSK-3β signaling in breast cancer cells
Source: PubMed Central journal article supplement (PMC5522130; doi:10.18632/oncotarget.17759), 2017-05-10
Supplement: oncotarget-08-43091-s001.pdf [file oncotarget-08-43091-s001.pdf]

## An anti-cancer WxxxE-containing azurin polypeptide inhibits Rac1-dependent STAT3 and ERK/GSK-3 $\beta$ signaling in breast cancer cells

### SUPPLEMENTARY FIGURES

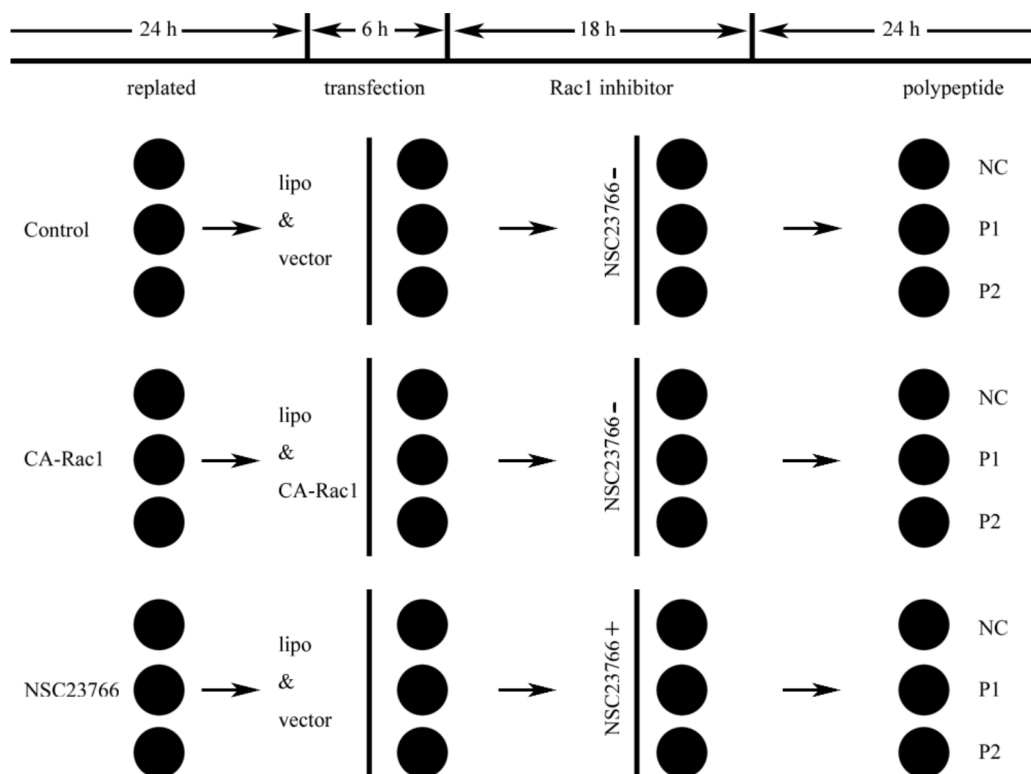

**Supplementary Figure 1:** The MCF-7 cells underwent treatment described as follows: replated in dishes (day 1), transfected with CA-Rac1 or control plasmids (the first 6 h, day 2), incubated with or without Rac1 inhibitor NSC23766 (the last 18 h, day 2), incubated with or without 1.0  $\mu$ M polypeptides before harvest (day 3).

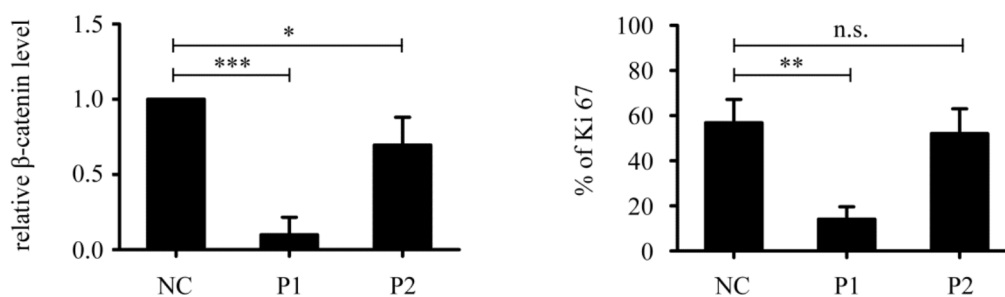

**Supplementary Figure 2: Quantitative analysis of IHC for  $\beta$ -catenin and Ki-67.** Tumor xenografts were treated by VWLGE- (P1), VWLGE-polypeptide (P2) or negative control (NC). Expression level of  $\beta$ -catenin (left, normalized to NC,  $n = 5$ , mean  $\pm$  SD) and percentage of Ki-67 positive cells (right,  $n = 3$ , mean  $\pm$  SD) were measured by Image-Pro Plus. \*,  $P < 0.05$ , \*\*,  $P < 0.01$  and \*\*\*,  $P < 0.001$ ; n.s.: not significant.
